# Supplementary material for: Facilitated Unidirectional Electron Transmission by Ru Nano Particulars Distribution on MXene Mo2C@g-C3N4 Heterostructures for Enhanced Photocatalytic H2 Evolution
Source: MDPI journal article supplement (doi:10.3390/molecules29071684), 2024-04-08
Supplement: s1 [file s1]

# Facilitated Unidirectional Electron Transmission by Ru Nano Particulars Distribution on MXene Mo<sub>2</sub>C@g-C<sub>3</sub>N<sub>4</sub> Heterostructures for Enhanced Photocatalytic H<sub>2</sub> Evolution

Qiuyu Chen <sup>1,2,†</sup>, Zonghan Huang <sup>1,2,†</sup>, Meng Liu <sup>1,2</sup>, Xiaoping Li <sup>1,2</sup>, Yuxuan Du <sup>1,2</sup>, Xiaobao Chen <sup>1,2</sup>, Dahu Ding <sup>3</sup>, Shengjiong Yang <sup>4</sup>, Yang Chen <sup>1,2,\*</sup> and Rongzhi Chen <sup>1,2,\*</sup>

- <sup>1</sup> College of Resources and Environment, University of Chinese Academy of Sciences, Beijing 100049, China; chenqiuyu20@mails.ucas.ac.cn (Q.C.)  
<sup>2</sup> Yanshan Earth Critical Zone and Surface Fluxes Research Station, University of Chinese Academy of Sciences, Beijing 100049, China  
<sup>3</sup> College of Resources and Environmental Sciences, Nanjing Agricultural University, Nanjing 210095, China  
<sup>4</sup> Key Laboratory of Environmental Engineering, Xi'an University of Architecture and Technology, No. 13, Yanta Road, Xi'an 710055, China  
\* Correspondence: chenyang@ucas.ac.cn (Y.C.); crz0718@ucas.ac.cn (R.C.)  
† These authors contributed equally to this work.

## Contents

|                                                                                                                                                      |    |
|------------------------------------------------------------------------------------------------------------------------------------------------------|----|
| Supplementary Material .....                                                                                                                         | 1  |
| 1.1.Characterization of samples.....                                                                                                                 | 1  |
| 1.2. Photocatalytic hydrogen evolution tests .....                                                                                                   | 1  |
| 1.3. Photoelectrochemical measurements.....                                                                                                          | 2  |
| Figure S1. SEM patterns of (a)MXene Mo <sub>2</sub> C, (b) Mo <sub>2</sub> C-Ru, (c) Bulk Mo <sub>2</sub> C and (d) Mo <sub>2</sub> C-Ru@CN. ....    | 3  |
| Figure S2. TEM patterns of (a) Mo <sub>2</sub> C-Ru@CN (b)~(d) Mo <sub>2</sub> C-Ru. ....                                                            | 4  |
| Figure S3. High-resolution XPS spectra of Ru 3d and C 1s.....                                                                                        | 5  |
| Figure S4. The H <sub>2</sub> evolution efficiency of physical mixed photocatalysts. ....                                                            | 6  |
| Figure S5. XRD patterns of Mo <sub>2</sub> C-Ru@CN before and after 5 cycles. ....                                                                   | 7  |
| Figure S6. LSV curves of CN, Mo <sub>2</sub> C@CN, and Ru-Mo <sub>2</sub> C@CN.....                                                                  | 8  |
| Table S1. Element contents in XPS .....                                                                                                              | 9  |
| Table S2. Comparison of hydrogen production performance of representative Mo <sub>2</sub> C /g-C <sub>3</sub> N <sub>4</sub> reported recently. .... | 10 |
| Table S3. Dynamics analysis of emission decay for different samples. ....                                                                            | 12 |
| The apparent quantum efficiency (AQE) calculation details: .....                                                                                     | 13 |
| References .....                                                                                                                                     | 14 |

### ***1.1.Characterization of samples***

Microstructure was analyzed using a field emission transmission electron microscope (TEM, FEI Tecnai G2 F30) and a field emission scanning electron microscope (SEM, JEOL JSM-7900F). Data on crystallinity stages were obtained by X-ray diffraction (XRD) analysis using the Bruker D8 Advance instrument at 40 kV and 40 mA with Cu K $\alpha$  radiation of 0.15406 nm wavelength. With Nicolet FT-IR spectrophotometer (Nexus 470), infrared spectra were collected via Fourier transform infrared spectroscopy. Testing the surface elements and chemical conditions using the Thermo Fisher Escalab 250Xi X-ray photoelectron spectrometer (XPS). UV-VIS diffuse reflectance spectra were measured using the UV-3600 Plus spectrophotometer. Photoluminescence (PL) and Time-resolved photoluminescence (TRPL) spectra were measured using an Edinburgh Instruments FLS 1000 fluorescence spectrophotometer.

### ***1.2. Photocatalytic hydrogen evolution tests***

N2000 chromatography workstation was used to assess the efficiency of photocatalytic hydrogen production. In the experiment, 20 mg of photocatalyst were dispersed in 50 mL of aqueous solution containing 5 mL of TEOA sacrificial agent. Using a cooling water system, the reaction solution was maintained at 5°C. In order to remove any residual air from the reaction system, argon gas was introduced for 30 minutes before initiating the photoreaction. A 300 W Xenon lamp with a cut-off filter ( $\lambda > 400$  nm) served as the light source. H<sub>2</sub> was quantified using a GC-2020 gas chromatograph (Zhiheng, Shandong) with argon as the carrier gas.

### ***1.3. Photoelectrochemical measurements***

Electrochemical and photoelectrochemical measurements were conducted on an electrochemical workstation CHI-660E with a typical three-electrode cell. The electrolyte consists of an aqueous  $\text{Na}_2\text{SO}_4$  with a concentration of 0.5 moles per liter. 4 mg of photocatalyst powder and 30  $\mu\text{L}$  of perfluorosulfonic acid in 1 mL of ethanol solution were added to the base of a 4 mm platinum carbon electrode, then it was air-dried and put into the electrolyte solution as a working electrode. The electrochemical impedance spectra (EIS) recording frequency range extended from 0.02 to  $1 \times 10^5$  Hz. Linear sweep voltammetry (LSV) testing using a scan rate of 0.05V/s. The photocurrent response performance of the catalyst was evaluated using an FX-300 Xe lamp with an illumination interval of 30 s. Mott-Schottky (M-S) curves were obtained in the voltage range -1 to 0.5 V with an amplitude of 0.01 V and a frequency of 200Hz.

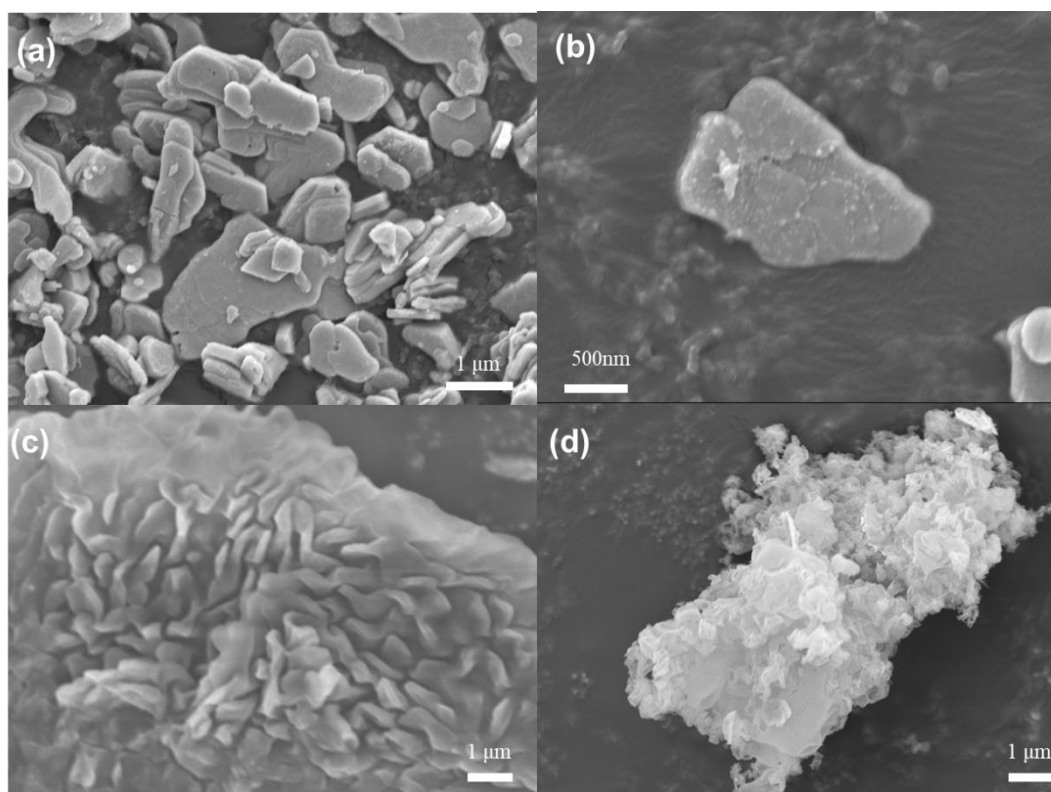

**Figure S1.** SEM patterns of (a)Mxene  $\text{Mo}_2\text{C}$ , (b)  $\text{Mo}_2\text{C}$ -Ru, (c) Bulk  $\text{Mo}_2\text{C}$  and (d)  $\text{Mo}_2\text{C}$ -Ru@CN.

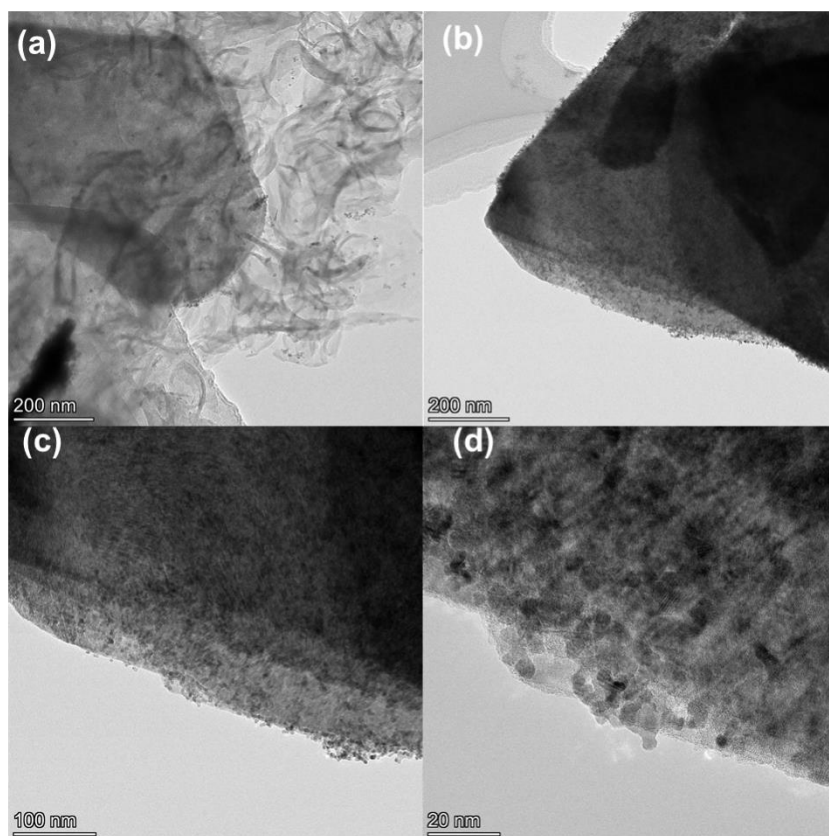

**Figure S2.** TEM patterns of (a) Mo<sub>2</sub>C-Ru@CN (b)~(d) Mo<sub>2</sub>C-Ru.

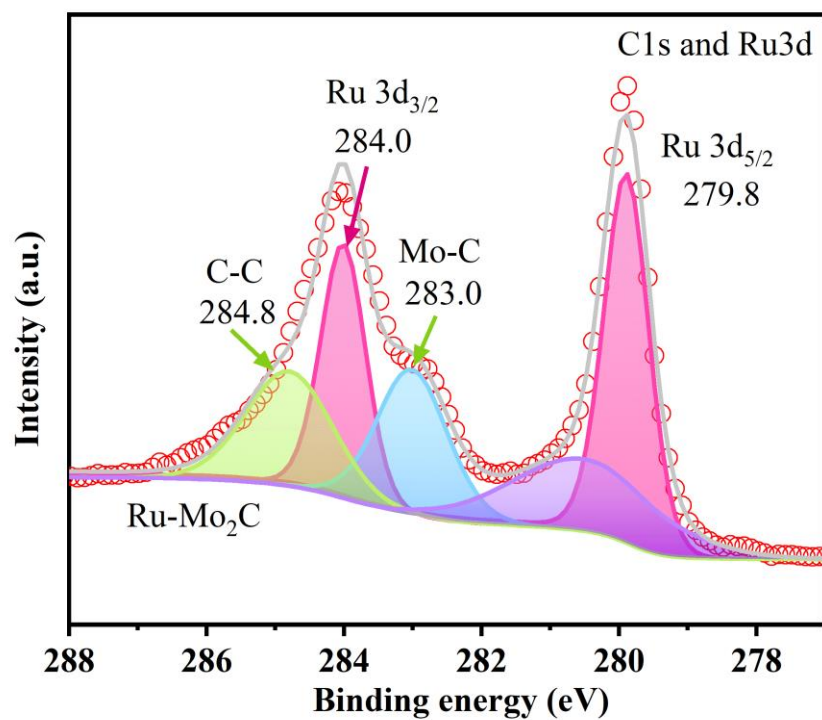

**Figure S3.** High-resolution XPS spectra of Ru 3d and C 1s.

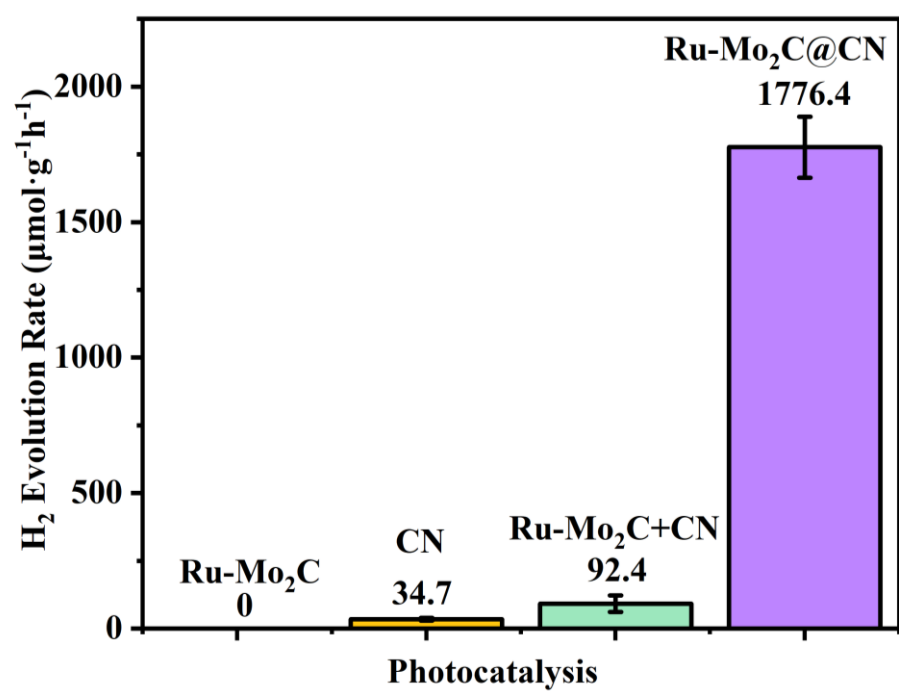

**Figure S4.** The H<sub>2</sub> evolution efficiency of physical mixed photocatalysts.

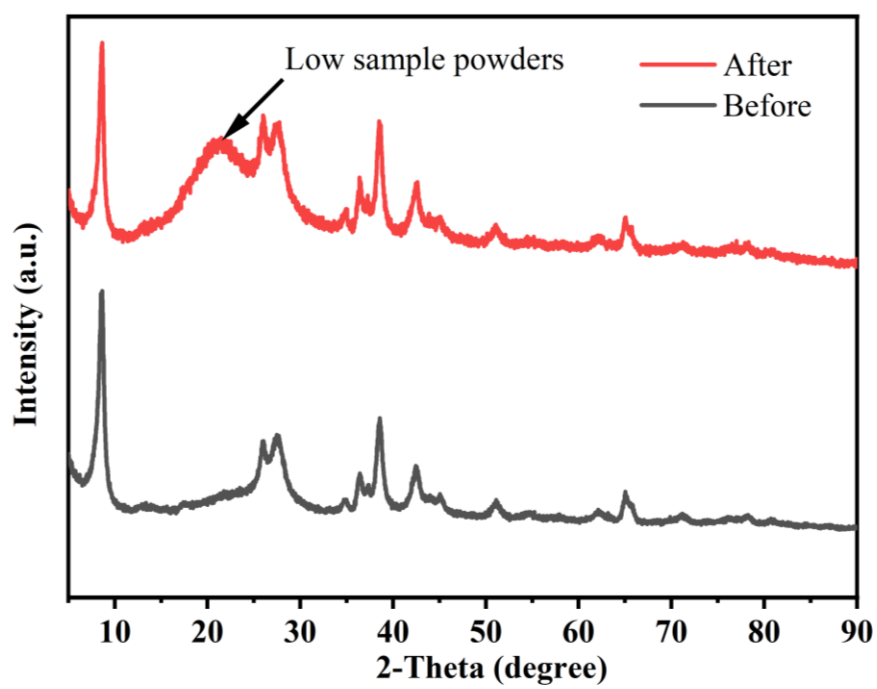

**Figure S5.** XRD patterns of Mo<sub>2</sub>C-Ru@CN before and after 5 cycles.

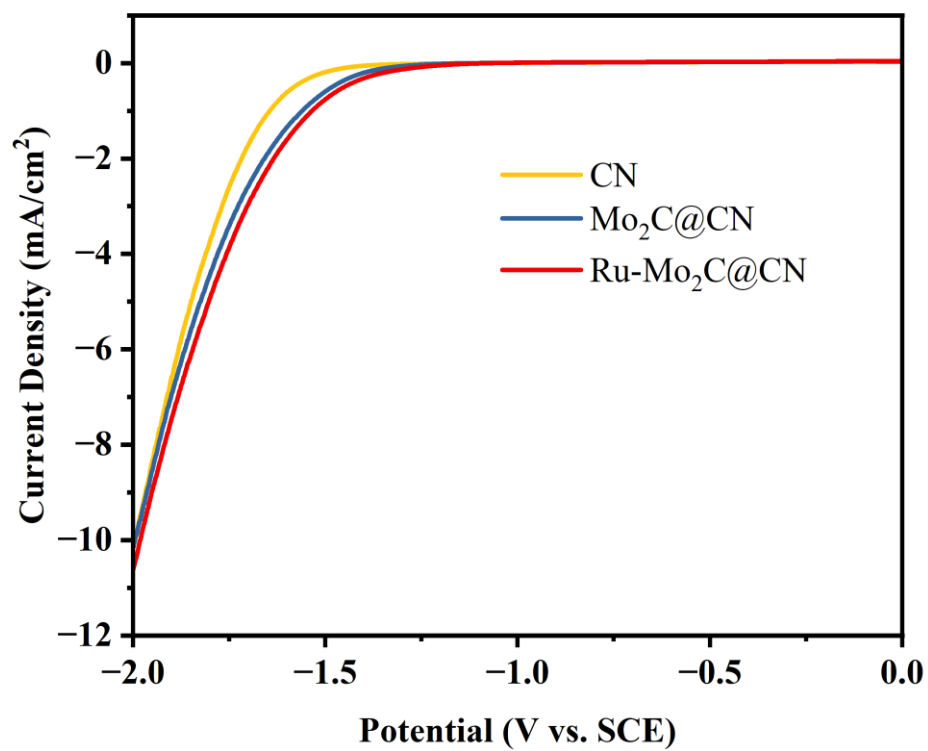

**Figure S6.** LSV curves of CN, Mo<sub>2</sub>C@CN, and Ru-Mo<sub>2</sub>C@CN.

**Table S1.** Element contents in XPS

| Atomic %                    | Ru    | C     | N     | Mo    |
|-----------------------------|-------|-------|-------|-------|
| Mo <sub>2</sub> C-<br>Ru@CN | 0.5   | 44.05 | 53.34 | 2.11  |
| Mo <sub>2</sub> C-Ru        | 6.20  | 62.00 | /     | 31.81 |
| CN                          | 52.45 | /     | 47.55 | /     |

**Table S2.** Comparison of hydrogen production performance of representative Mo<sub>2</sub>C/g-C<sub>3</sub>N<sub>4</sub> reported recently.

| Photocatalyst                                        | Light source                | H <sub>2</sub> production (μmol·g <sup>-1</sup> ·h <sup>-1</sup> ) | Photocatalytic conditions   | Time per cycle (h) | Reference |
|------------------------------------------------------|-----------------------------|--------------------------------------------------------------------|-----------------------------|--------------------|-----------|
| Mo-Mo <sub>2</sub> C/g-C <sub>3</sub> N <sub>4</sub> | 300 W Xe lamp<br>(λ>420 nm) | 219.7                                                              | 5 mg, TEOA solution         | 5<br>(5 cycles)    | [1]       |
| Mo <sub>2</sub> C/g-C <sub>3</sub> N <sub>4</sub>    | 300 W Xe lamp<br>(λ>420 nm) | 507                                                                | 50 mg, TEOA and Pt solution | 3<br>(5 cycles)    | [2]       |
| Mo <sub>2</sub> C/g-C <sub>3</sub> N <sub>4</sub>    | 300 W Xe lamp<br>(λ>400 nm) | 1696.4                                                             | 10 mg, TEOA solution        | 3<br>(5 cycles)    | [3]       |
| Mo <sub>2</sub> C/g-C <sub>3</sub> N <sub>4</sub>    | 300 W Xe lamp<br>(λ>400 nm) | 180                                                                | 5 mg, TEOA solution         | 16<br>(1 cycles)   | [4]       |
| Mo <sub>2</sub> C/g-C <sub>3</sub> N <sub>4</sub>    | 300 W Xe lamp<br>(λ>420 nm) | 675.27                                                             | 20 mg, TEOA solution        | 5<br>(4 cycles)    | [5]       |
| Mo <sub>2</sub> C@C/g-C <sub>3</sub> N <sub>4</sub>  | 300 W Xe lamp               | 2269.47                                                            | 10 mg, TEOA solution        | 1<br>(5 cycles)    | [6]       |

|                                                               |                                                                             |        |                         |                    |                            |
|---------------------------------------------------------------|-----------------------------------------------------------------------------|--------|-------------------------|--------------------|----------------------------|
| MoC-<br>Mo <sub>2</sub> C/g-<br>C <sub>3</sub> N <sub>4</sub> | 300 W Xe<br>lamp<br>( $\lambda > 420$ nm)                                   | 4078   | 20 mg, TEOA<br>solution | 65 h<br>(1 cycles) | [7]                        |
| Mo <sub>2</sub> C-<br>Ru@g-<br>C <sub>3</sub> N <sub>4</sub>  | <b>300 W Xe</b><br><b>lamp</b><br><b>(<math>\lambda &gt; 400</math> nm)</b> | 1776.4 | 20 mg, TEOA<br>solution | 2<br>(5 cycles)    | <b>This</b><br><b>work</b> |

**Table S3.** Dynamics analysis of emission decay for different samples.

| Species              | $A_1$ | $\tau_1$ (ns) | $A_2$ | $\tau_2$ (ns) | $\tau$ (ns) |
|----------------------|-------|---------------|-------|---------------|-------------|
| CN                   | 0.094 | 5.0858        | 0.009 | 39.7425       | 19.94       |
| Mo <sub>2</sub> C@CN | 0.143 | 4.4783        | 0.010 | 36.6520       | 16.54       |
| Mo <sub>2</sub> C-   | 0.150 | 4.4262        | 0.010 | 37.3208       | 16.52       |
| Ru@CN                |       |               |       |               |             |

### The apparent quantum efficiency (AQE) calculation details:

The apparent quantum efficiency (AQE) for hydrogen evolution was measured under the visible light irradiation by using a band-pass filter ( $\lambda = 400$  nm) and a 300 W Xe lamp, which could be calculated as follows:

$$AQE = \frac{N_e}{N_p} \times 100\% = \frac{2 \times M \times N_A \times h \times c}{S \times P \times t \times \lambda} \times 100\%$$

where  $N_e$  is the amount of reaction electrons,  $N_p$  is the incident photons,  $M$  is the amount of  $H_2$  molecule,  $N_A$  is the Avogadro constant,  $h$  is the Planck constant,  $c$  is the speed of light,  $S$  is the irradiation area,  $P$  is the intensity of the irradiation,  $t$  is the photoreaction time, and  $\lambda$  is the wavelength of the monochromatic light. The photo intensity was confirmed by Solar Power Meter (SM206). The irradiation area was controlled at  $26.42 \text{ cm}^2$ , and the photocatalytic reaction was controlled for 1 h.

When  $\lambda = 400$  nm,  $P = 318 \text{ W} \cdot \text{m}^{-2}$ ,  $t = 1$  h,  $H_2$  production =  $181.2 \text{ } \mu\text{mol}$ ,

$$AQE = \frac{N_e}{N_p} \times 100\% = \frac{2 \times 181.2 \times 10^{-6} \times 6.02 \times 10^{23} \times 6.626 \times 10^{-34} \times 3 \times 10^8}{26.42 \times 10^{-4} \times 3600 \times 400 \times 10^{-9} \times 318} = 3.58\%$$

## References

- [1] J. Dong, Y. Shi, C. Huang, Q. Wu, T. Zeng, W. Yao, A New and stable Mo-Mo<sub>2</sub>C modified g-C<sub>3</sub>N<sub>4</sub> photocatalyst for efficient visible light photocatalytic H<sub>2</sub> production, *Applied Catalysis B: Environmental*, 243 (2019) 27-35.
- [2] J. Zhang, M. Wu, B. He, R. Wang, H. Wang, Y. Gong, Facile synthesis of rod-like g-C<sub>3</sub>N<sub>4</sub> by decorating Mo<sub>2</sub>C co-catalyst for enhanced visible-light photocatalytic activity, *Applied Surface Science*, 470 (2019) 565-572.
- [3] R.-Y. Liu, L. Ding, G.-D. Yang, J.-Y. Zhang, R. Jiao, H.-Z. Sun, Hollow Mo<sub>2</sub>C nanospheres modified B-doped g-C<sub>3</sub>N<sub>4</sub> for high efficient photocatalysts, *Journal of Physics D: Applied Physics*, 55 (2022).
- [4] J. Du, Y. Shen, F. Yang, B. Zhang, X. Jiang, C. An, J. Ye, In situ construction of an  $\alpha$ -Mo<sub>2</sub>C/g-C<sub>3</sub>N<sub>4</sub> Mott–Schottky heterojunction with high-speed electron transfer channel for efficient photocatalytic H<sub>2</sub> evolution, *Inorganic Chemistry Frontiers*, 10 (2023) 832-840.
- [5] W. Liu, D. Zhang, R. Wang, Z. Zhang, S. Qiu, 2D/2D Interface Engineering Promotes Charge Separation of Mo<sub>2</sub>C/g-C<sub>3</sub>N<sub>4</sub> Nanojunction Photocatalysts for Efficient Photocatalytic Hydrogen Evolution, *ACS Appl Mater Interfaces*, 14 (2022) 31782-31791.
- [6] Y. Song, K. Xia, Y. Gong, H. Chen, L. Li, J. Yi, X. She, Z. Chen, J. Wu, H. Li, H. Xu, Controllable synthesized heterostructure photocatalyst Mo<sub>2</sub>C@C/2D g-C<sub>3</sub>N<sub>4</sub>: enhanced catalytic performance for hydrogen production, *Dalton Transactions*, 47 (2018) 14706-14712.
- [7] X.Q. Tan, P. Zhang, B. Chen, A.R. Mohamed, W.J. Ong, Synergistic effect of dual phase cocatalysts: MoC-Mo<sub>2</sub>C quantum dots anchored on g-C<sub>3</sub>N<sub>4</sub> for high-stability photocatalytic hydrogen evolution, *J Colloid Interface Sci*, 662 (2024) 870-882.
